# Supplementary material for: Assembly of copper-clusters into a framework: enhancing the structural stability and photocatalytic HER performance
Source: Royal Society of Chemistry journal article supplement (doi:10.1039/d3cc00275f), 2023-01-01
Supplement: d3cc00275f1.pdf [file d3cc00275f1.pdf]

## Supporting Information

### **Assembly of copper-cluster into framework: enhancing structural stability and photocatalytic HER performance**

Yue Xu,<sup>‡a</sup> Qing-Guo Dong,<sup>‡a</sup> Jian-Peng Dong,<sup>a</sup> Huan Zhang,<sup>a</sup> Bo Li,<sup>\*b</sup> Rui Wang<sup>\*a</sup> and Shuang-Quan Zang<sup>\*a</sup>

<sup>a</sup> Henan Key Laboratory of Crystalline Molecular Functional Materials, Henan International Joint Laboratory of Tumor Theranostical Cluster Materials, Green Catalysis Center, and College of Chemistry, Zhengzhou University, Zhengzhou 450001, China

<sup>b</sup> Collaborative Innovation Center of Water Security for Water Source Region of Mid-line of South-to-North Diversion Project of Henan Province, College of Chemistry and Pharmacy Engineering, Nanyang Normal University, Nanyang 473061, China

E-mail: zangsqzg@zzu.edu.cn; wangruijy@zzu.edu.cn; libony0107@nynu.edu.cn

## Experimental Details

**Materials and reagents.** All of the ingredients for the synthesis were purchased commercially and utilized without further purification.

**Instrumentation.** Powder X-ray powder diffraction (PXRD) patterns were recorded by using a Rigaku D/Max-2500PC diffractometer with Cu K $\alpha$ 1 radiation ( $\lambda = 1.540598 \text{ \AA}$ ) at room temperature. TG analyses of the compounds were performed on a TGA-Q50 thermal analyzer from room temperature to 600 °C at a heating rate of 10 °C/min under an N<sub>2</sub> atmosphere. Fourier transform infrared (FT-IR) spectra were recorded on a Bruker TENSOR 27 FT-IR spectrometer in the 400-4000 cm<sup>-1</sup> region. Elemental analyses (EA) were carried out with a Perkin-Elmer 240 elemental analyzer. UV-visible absorption spectra were recorded on a UH4150 spectrophotometer. The Ultraviolet Photoelectron Spectrometer (UPS) was recorded using a PHI5000 VersaProbe III spectrophotometer with a 21.2 eV photon energy He I light source. The adsorption isotherms of N<sub>2</sub> were measured by a volumetric method automatic volumetric adsorption equipment (Belsorp Max) at 77 K.

**Crystallographic data collection and structural refinement.** SCXRD measurements of Cu<sub>8</sub>SN<sub>4</sub> and Cu<sub>6</sub>-Cu-MOF were performed at 200 K on a Rigaku XtaLAB Pro diffractometer with Cu-K $\alpha$  radiation ( $\lambda = 1.54184 \text{ \AA}$ ). Data collection and reduction were performed using the program CrysAlisPro. All the structures were solved with direct methods (SHELXS)<sup>1</sup> and refined by full-matrix least-squares on F<sup>2</sup> using OLEX2,<sup>2</sup> which utilizes the SHELXL-2015 module.<sup>3</sup> The imposed restraints and constraints (ISOR, DFIX, DELU, TRIA, etc.) in the least-squares refinement of each structure were commented in the corresponding crystallographic CIF files. The crystal structures are visualized by DIAMOND3.2. Detailed information about the X-ray crystallography data, intensity collection procedure, and refinement results for all cluster compounds are summarized in Tables S1 and S2.

## Synthesis

**Synthesis of  $\text{Cu}_8\text{SN}_4$ .** ( $\text{tBuSCu}$ )<sub>n</sub> (0.008 g, 0.052 mmol) are added to methylbenzene (2.0 ml) and 20  $\mu\text{L}$  trifluoroacetic acid is added during the stirring process, and then mixed with 2 mL of Tetrahydrofuran containing 4-(4-Pyridinyl)thiazole-2-thiol (0.005 g, 0.026 mmol) under stirring and subsequently filtered. The filtrate was slowly evaporated at room temperature, and a large number of yellow block crystals were obtained after 6h (yield is 75% based on Cu).

**Synthesis of  $\text{Cu}_2\text{I}_2(\text{3-pc})_4$  (3-pc = 3-Picoline).** The synthesis of  $\text{Cu}_2\text{I}_2(\text{3-pc})_4$  was carried out by a modified version of the reported method.<sup>4</sup>  $\text{CuI}$  (0.19 g, 1.0 mmol) was first well-dispersed in 10 mL acetone in an open reaction vial, and 3-pc (0.37 g, 4.0 mmol) was slowly added under magnetic stirring at room temperature. The pure phase of the sample was collected by filtration after 10 min of continuous stirring (yield is 83% based on Cu). This compound was used as the precursor and was remade in large quantities for the synthesis of other structures.

**Synthesis of CCMOF.** 0.0135 mg  $\text{Cu}_8\text{SN}_4$  was added into 2 mL DMF and dissolved by ultrasound. 0.0075 mg  $\text{Cu}_2\text{I}_2(\text{3-pc})_4$  was added to 3 mL acetone and dissolved by ultrasound. DMF solution of  $\text{Cu}_8\text{SN}_4$  was added to acetone solution of  $\text{Cu}_2\text{I}_2(\text{3-pc})_4$  in the course of stirring, then stirred for 1~2 minutes, the filtrate evaporated and crystallized at room temperature, and green bulk  $\text{Cu}_6\text{-Cu-MOF}$  was obtained after 2 days (yield is 32% based on Cu).

**Photocatalytic HER Experiments.** The photocatalytic HER reaction was carried in a 60 mL Pyrex cell with visible light. In a typical photocatalytic experiment, the catalyst (2.0 mg) was suspended in  $\text{H}_2\text{O}/\text{EtOH}$  (v:v = 1:1) containing TEA (3 mL) and fluorescein (9.0 mg). Before irradiation, the suspension of the catalyst was dispersed in an ultrasonic bath for 10 minutes, and then  $\text{N}_2$  was bubbled through the reaction mixture

for 20 minutes to completely remove oxygen. Sampling was conducted intermittently through the silicone rubber septum during experiments. The amount of produced  $H_2$  was monitored in real-time by GC analysis of the headspace gases by using an Agilent GC7820 Gas Chromatograph ( $N_2$  as the gas carrier).

**Electrochemical measurements.** Take two milligrams of samples (CCMOF), add 0.5 ml of ethanol and 10  $\mu$ L of Nafion solution, respectively, and ultrasonically disperse for 20 minutes. Take 30  $\mu$ L of the dispersion and drop it onto the glassy carbon electrode to prepare a working electrode. The standard three-electrode system was used on the electrochemical workstation (CHI66E), the Ag/AgCl was used as the reference electrode, and 0.5 M sodium sulfate solution as the electrolyte. The EIS experiment was carried out with a starting potential of -0.4 V and a frequency range of  $10^6$ – $10^{-2}$  Hz.

### Supplementary Figures S1-S19

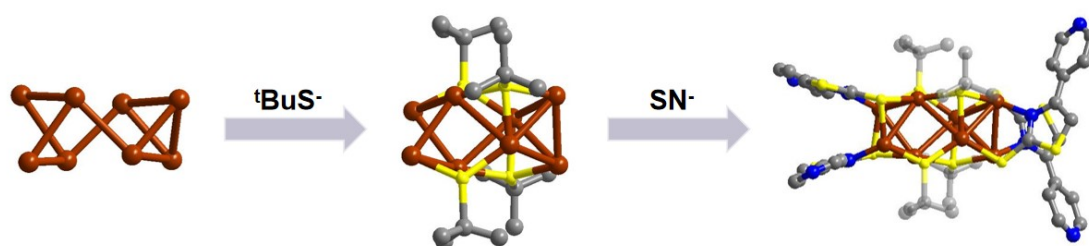

**Figure S1.** The structure and coordination mode of  $Cu_8SN_4$  cluster unit.

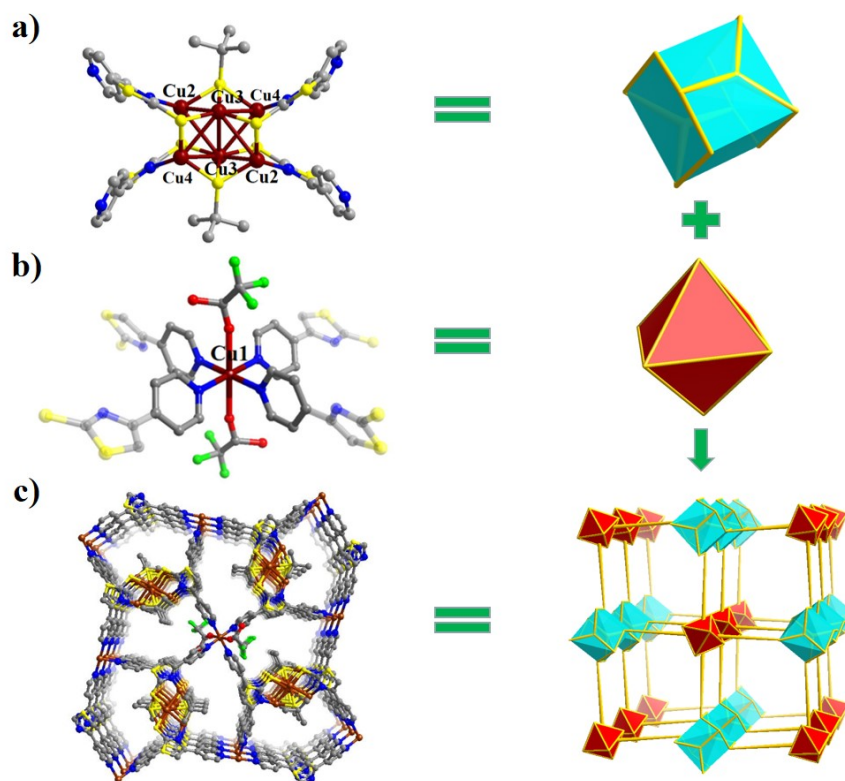

**Figure S2.** a) Hexanuclear  $[\text{Cu}_6(\text{tBuS})_2(\text{SN})_4]$  SBUs with distorted tetragonal bipyramidal geometry; b) Six-coordinated single-core copper node with octahedral configuration; c) CCMOF with 2-dimensional A-A stacking and its topological structure. (Color code: C, gray; Cu, brown; S, yellow; O, red; N, blue; F, bright green; H atoms are omitted for clarity.) The  $\text{Cu}_6$  secondary building units (SBUs) presents an unusual twisted tetragonal bipyramidal geometry in which Cu2 and Cu4 atoms lie in the equatorial plane while two Cu3 atoms occupying parallel positions in the plane. Three S atoms from two distinct SN ligands and one tBuS- ligand coordinated Cu(I) at both ends of a twisted polyhedron, where the observed bond lengths of Cu-S were 2.219 ~ 2.349 Å. The copper cluster units were interconnected by Cu(II) center to develop a two-dimensional AA stacking system.

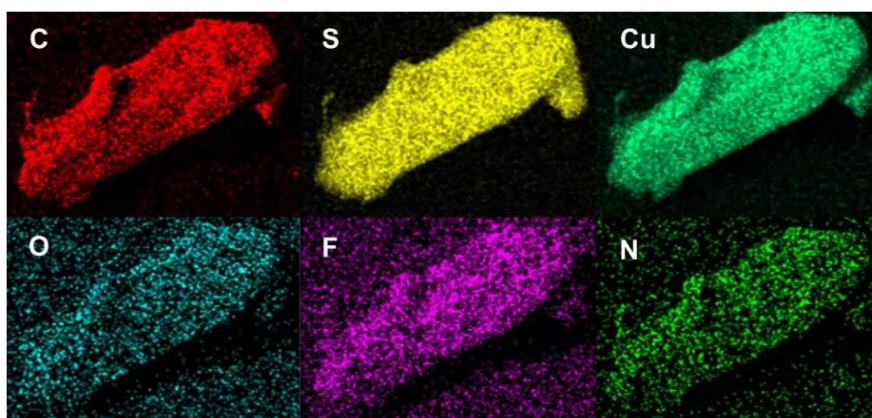

**Figure S3.** EDS elemental mapping images of CCMOF.

**Table S1.** X-ray measurements and structure solution of Cu<sub>8</sub>SN<sub>4</sub>.

| Cu <sub>8</sub> SN <sub>4</sub>                              |                                                                                |
|--------------------------------------------------------------|--------------------------------------------------------------------------------|
| Empirical formula                                            | C <sub>48</sub> H <sub>56</sub> Cu <sub>8</sub> N <sub>8</sub> S <sub>12</sub> |
| Formula weight                                               | 1638.04                                                                        |
| Temperature/K                                                | 199.99 (10)                                                                    |
| Crystal system                                               | Orthorhombic                                                                   |
| Space group                                                  | <i>P</i> 2 <sub>1</sub> 2 <sub>1</sub> 2                                       |
| <i>a</i> / Å                                                 | 10.1385(2)                                                                     |
| <i>b</i> / Å                                                 | 19.1450(5)                                                                     |
| <i>c</i> / Å                                                 | 15.7602(3)                                                                     |
| <i>α</i> / °                                                 | 90                                                                             |
| <i>β</i> / °                                                 | 90                                                                             |
| <i>γ</i> / °                                                 | 90                                                                             |
| Volume / Å <sup>3</sup>                                      | 3059.08(12)                                                                    |
| <i>Z</i>                                                     | 2                                                                              |
| $\rho_{\text{calc}}$ g / cm <sup>3</sup>                     | 1.778                                                                          |
| $\mu$ / mm <sup>-1</sup>                                     | 7.135                                                                          |
| <i>F</i> (000)                                               | 1648.00                                                                        |
| Crystal size / mm <sup>3</sup>                               | 0.3 × 0.1 × 0.1                                                                |
| Radiation                                                    | Cu K $\alpha$ ( $\lambda$ = 1.54184)                                           |
| 2 $\theta$ range for data collection/°                       | 7.266 to 148.766                                                               |
| Index ranges                                                 | -7 ≤ <i>h</i> ≤ 12,<br>-23 ≤ <i>k</i> ≤ 23,<br>-19 ≤ <i>l</i> ≤ 18             |
| Reflections collected                                        | 10734                                                                          |
| Independent reflections                                      | 5537 [ <i>R</i> <sub>int</sub> = 0.0380, <i>R</i> <sub>sigma</sub> = 0.0535]   |
| Data / restraints / parameters                               | 5537/51/379                                                                    |
| Goodness-of-fit on <i>F</i> <sup>2</sup>                     | 1.059                                                                          |
| Final <i>R</i> indexes [all data]                            | <i>R</i> <sub>1</sub> = 0.0449, <i>wR</i> <sub>2</sub> = 0.1138                |
| Final <i>R</i> indexes [ <i>I</i> ≥ 2 $\sigma$ ( <i>I</i> )] | <i>R</i> <sub>1</sub> = 0.0525, <i>wR</i> <sub>2</sub> = 0.1189                |
| Largest diff. peak/hole / e Å <sup>-3</sup>                  | 0.54/-0.54                                                                     |
| Flack parameter                                              | -0.02(2)                                                                       |
| CCDC                                                         | 2079381                                                                        |

$$R_1 = \frac{\sum ||F_o| - |F_c||}{\sum |F_o|}, \quad wR_2 = \left[ \frac{\sum w(F_o^2 - F_c^2)^2}{\sum w(F_o^2)^2} \right]^{1/2}$$

**Table S2.** X-ray measurements and structure solution of CCMOF.

|                                                              | CCMOF                                                                                                        |
|--------------------------------------------------------------|--------------------------------------------------------------------------------------------------------------|
| Empirical formula                                            | C <sub>56</sub> H <sub>62</sub> Cu <sub>7</sub> F <sub>6</sub> N <sub>8</sub> O <sub>8</sub> S <sub>10</sub> |
| Formula weight                                               | 1854.51                                                                                                      |
| Temperature/K                                                | 200.00(10)                                                                                                   |
| Crystal system                                               | monoclinic                                                                                                   |
| Space group                                                  | <i>P</i> 2 <sub>1</sub> / <i>c</i>                                                                           |
| <i>a</i> / Å                                                 | 9.63270(10)                                                                                                  |
| <i>b</i> / Å                                                 | 19.2788(3)                                                                                                   |
| <i>c</i> / Å                                                 | 18.8668(2)                                                                                                   |
| <i>α</i> / °                                                 | 90                                                                                                           |
| <i>β</i> / °                                                 | 91.1760(10)                                                                                                  |
| <i>γ</i> / °                                                 | 90                                                                                                           |
| Volume / Å <sup>3</sup>                                      | 3502.96(8)                                                                                                   |
| <i>Z</i>                                                     | 2                                                                                                            |
| $\rho_{\text{calc}}$ g / cm <sup>3</sup>                     | 1.758                                                                                                        |
| $\mu$ / mm <sup>-1</sup>                                     | 5.702                                                                                                        |
| <i>F</i> (000)                                               | 1870.0                                                                                                       |
| Crystal size / mm <sup>3</sup>                               | 0.4 × 0.2 × 0.1                                                                                              |
| Radiation                                                    | Cu K $\alpha$ ( $\lambda$ = 1.54184)                                                                         |
| 2 $\theta$ range for data collection / °                     | 6.556 to 148.078                                                                                             |
| Index ranges                                                 | -9 ≤ <i>h</i> ≤ 11,<br>-23 ≤ <i>k</i> ≤ 21,<br>-19 ≤ <i>l</i> ≤ 23                                           |
| Reflections collected                                        | 20888                                                                                                        |
| Independent reflections                                      | 6930 [ <i>R</i> <sub>int</sub> = 0.0454, <i>R</i> <sub>sigma</sub> = 0.0532]                                 |
| Data / restraints / parameters                               | 6930/92/452                                                                                                  |
| Goodness-of-fit on <i>F</i> <sup>2</sup>                     | 1.045                                                                                                        |
| Final <i>R</i> indexes [ <i>I</i> ≥ 2 $\sigma$ ( <i>I</i> )] | <i>R</i> <sub>1</sub> = 0.0645, <i>wR</i> <sub>2</sub> = 0.1758                                              |
| Final <i>R</i> indexes [all data]                            | <i>R</i> <sub>1</sub> = 0.0829, <i>wR</i> <sub>2</sub> = 0.1904                                              |
| Largest diff. peak/hole / e Å <sup>-3</sup>                  | 1.45/-1.04                                                                                                   |
| CCDC                                                         | 2079399                                                                                                      |

$$R_1 = \frac{\sum ||F_o| - |F_c||}{\sum |F_o|}, \quad wR_2 = \left[ \frac{\sum w(F_o^2 - F_c^2)^2}{\sum w(F_o^2)^2} \right]^{1/2}$$

**Table S3.** Bond Lengths in Cu<sub>8</sub>SN<sub>4</sub> at 200 K.

|                      |            |         |           |
|----------------------|------------|---------|-----------|
| Cu4-Cu4 <sup>1</sup> | 2.890(2)   | N2-C8   | 1.313(10) |
| Cu4-Cu3              | 2.8256(14) | N2-C6   | 1.371(9)  |
| Cu4-N3 <sup>1</sup>  | 2.7330(14) | C23-C24 | 1.372(11) |
| Cu4-S5 <sup>1</sup>  | 2.268(2)   | C23-C22 | 1.465(11) |
| Cu4-S4               | 2.225(2)   | C23-C27 | 1.384(13) |
| Cu4-N3               | 2.044(5)   | C9-C12  | 1.517(13) |
| Cu1-Cu2 <sup>1</sup> | 2.9256(16) | C9-C11  | 1.516(13) |
| Cu1-Cu2              | 2.6399(15) | C9-C10  | 1.506(12) |
| Cu1-S3               | 2.190(2)   | C24-C25 | 1.361(13) |
| Cu1-S2 <sup>1</sup>  | 2.274(3)   | C22-C21 | 1.383(12) |
| Cu1-N2               | 2.011(6)   | C27-C26 | 1.376(13) |
| Cu3-Cu2 <sup>1</sup> | 2.9903(14) | N4-C25  | 1.316(14) |
| Cu3-S5 <sup>1</sup>  | 2.2790(19) | N4-C26  | 1.316(14) |
| Cu3-S41              | 2.286(2)   | C4-C5   | 1.347(13) |
| Cu3-S3               | 2.2463(19) | C4-C3   | 1.369(16) |
| Cu2-S4               | 2.2594(19) | C5-C6   | 1.483(11) |
| Cu2-S3               | 2.331(2)   | C5-C1   | 1.352(14) |
| Cu2-S2               | 2.2757(19) | C6-C7   | 1.344(11) |
| S5-C20               | 1.738(8)   | N1-C3   | 1.336(16) |
| S4-C9                | 1.883(8)   | N1-C2   | 1.276(17) |
| S3-C13               | 1.900(10)  | C13-C15 | 1.54(2)   |



|        |           |         |           |
|--------|-----------|---------|-----------|
| S2-C8  | 1.756(8)  | C13-C19 | 1.55(2)   |
| S1-C8  | 1.716(8)  | C13-C17 | 1.41(2)   |
| S1-C7  | 1.693(9)  | C13-C18 | 1.61(3)   |
| S6-C20 | 1.712(8)  | C13-C14 | 1.42(3)   |
| S6-C21 | 1.691(10) | C13-C16 | 1.67(3)   |
| N3-C20 | 1.324(9)  | C1-C2   | 1.431(17) |
| N3-C22 | 1.390(9)  |         |           |

<sup>1</sup>-1x, 1-y, +z

**Table S4.** Bond Lengths in CCMOF at 200 K.

|                      |            |         |           |
|----------------------|------------|---------|-----------|
| Cu4-N2               | 2.027(4)   | N3-C9   | 1.337(8)  |
| Cu4-N2 <sup>1</sup>  | 2.027(4)   | N1-C3   | 1.381(7)  |
| Cu4-N3 <sup>1</sup>  | 2.051(4)   | N1-C1   | 1.315(7)  |
| Cu4-N3               | 2.051(4)   | C14-C11 | 1.472(7)  |
| Cu4-O1               | 2.437(4)   | C14-C15 | 1.350(10) |
| Cu3-O1 <sup>1</sup>  | 2.437(4)   | C11-C10 | 1.380(8)  |
| Cu3-Cu1 <sup>2</sup> | 3.0245(11) | C11-C12 | 1.379(8)  |
| Cu3-Cu2 <sup>2</sup> | 2.6731(11) | C6-C5   | 1.376(8)  |
| Cu3-Cu2 <sup>3</sup> | 2.9097(11) | C4-C5   | 1.385(8)  |
| Cu3-S1 <sup>2</sup>  | 2.2472(16) | C4-C3   | 1.474(8)  |
| Cu3-S5               | 2.2189(16) | C4-C8   | 1.378(8)  |
| Cu3-N4               | 2.6537(4)  | C3-C2   | 1.351(8)  |

|                      |            |         |           |
|----------------------|------------|---------|-----------|
| Cu1-Cu2 <sup>4</sup> | 3.0301(12) | O3-C30  | 1.194(10) |
| Cu1-Cu2              | 2.6537(11) | C7-C8   | 1.368(9)  |
| Cu1-S4 <sup>5</sup>  | 2.2630(15) | C13-C12 | 1.387(8)  |
| Cu1-S5 <sup>6</sup>  | 2.2314(15) | C18-C19 | 1.534(11) |
| Cu1-N1               | 2.008(4)   | C18-C17 | 1.492(11) |
| Cu2-Cu2 <sup>4</sup> | 2.9501(16) | C18-C20 | 1.500(11) |
| Cu2-S1               | 2.2865(15) | C10-C9  | 1.379(8)  |
| Cu2-S4 <sup>6</sup>  | 2.3042(16) | C21-C22 | 1.444(8)  |
| Cu2-S5 <sup>6</sup>  | 2.3494(15) | C21-O2  | 1.386(8)  |
| S1-C1                | 1.744(6)   | C30-C29 | 1.490(13) |
| S4-C16               | 1.742(6)   | C30-C31 | 1.503(13) |
| S5-C18               | 1.874(7)   | O4-C32  | 1.222(15) |
| S2-C1                | 1.713(5)   | C32-C33 | 1.49(2)   |
| S2-C2                | 1.709(6)   | C32-C34 | 1.404(18) |
| S3-C16               | 1.709(6)   | O1-C21  | 1.282(7)  |
| S3-C15               | 1.701(8)   | C22-F1  | 1.364(11) |
| N4-C14               | 1.375(7)   | C22-F4  | 1.407(9)  |
| N4-C16               | 1.323(6)   | C22-F5  | 1.427(15) |
| N2-C6                | 1.339(8)   | C22-F19 | 1.166(10) |
| N2-C7                | 1.328(8)   | C22-F7  | 1.332(11) |
| N3-C13               | 1.329(8)   | C22-F11 | 1.369(10) |

<sup>1</sup>1-x,1-y, 1-z; <sup>2</sup>+x, 1/2-y, 1/2+z; <sup>3</sup>1-x, 1/2+y, 3/2-z; <sup>4</sup>1-x, -y, 1-z; <sup>5</sup>+x, 1/2-y, -1/2+z; <sup>6</sup>1-x, -1/2+y, 3/2-z

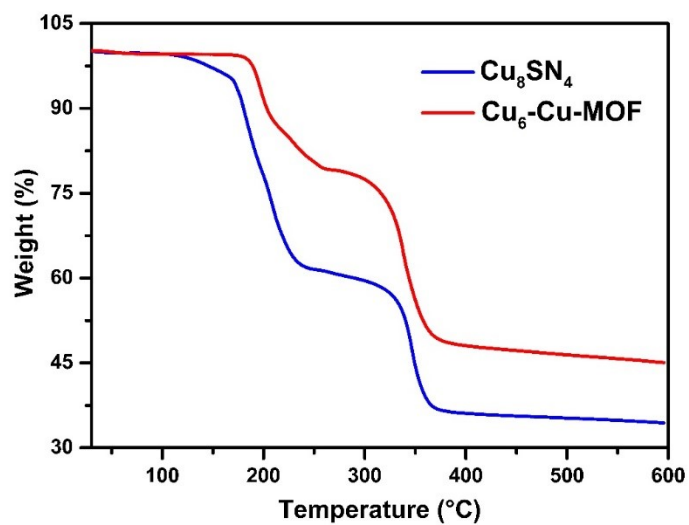

Figure S4. TGA plots of  $\text{Cu}_8\text{SN}_4$  cluster and CCMOF under  $\text{N}_2$  atmosphere.

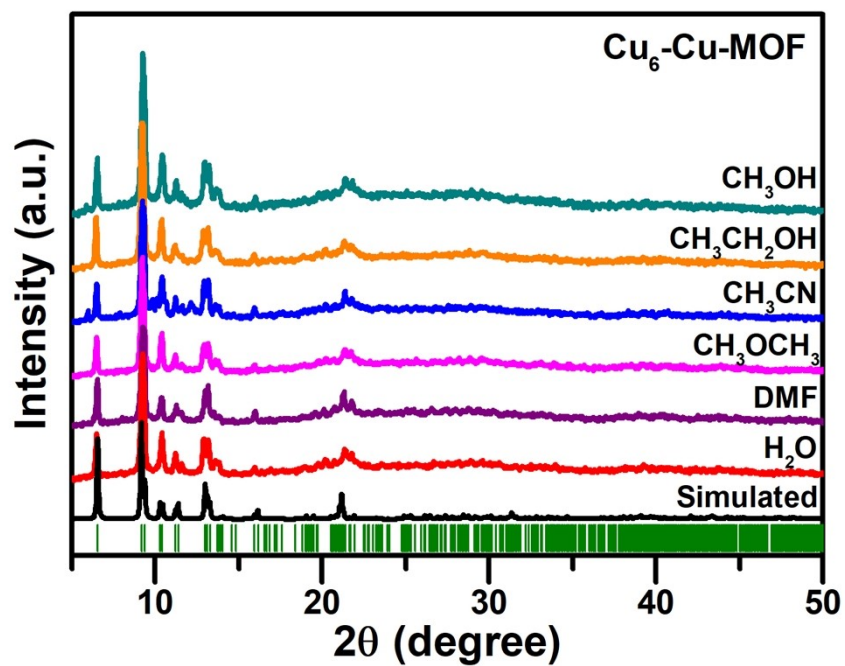

Figure S5. PXRD patterns of CCMOF immersed in different common organic solvents for 48 hours.

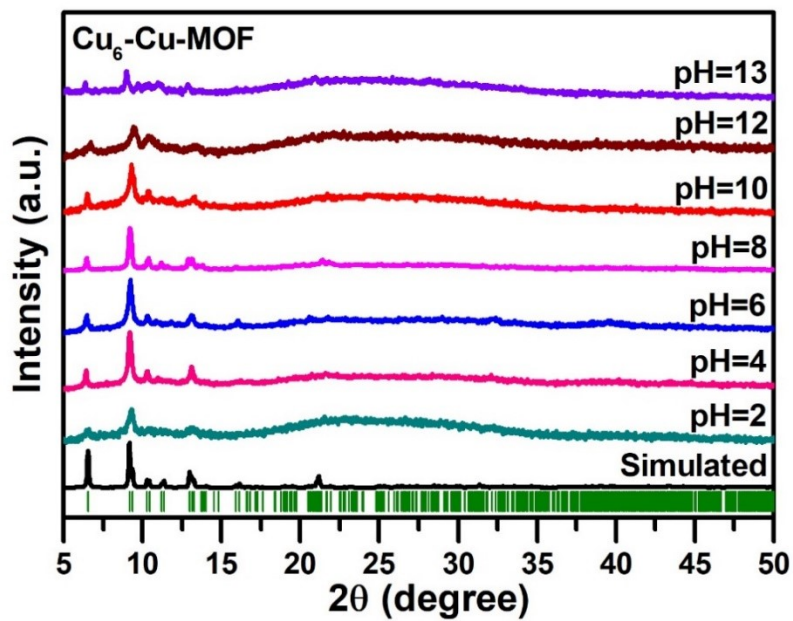

Figure S6. PXRD patterns of CCMOF treated with different pH for 24 hours.

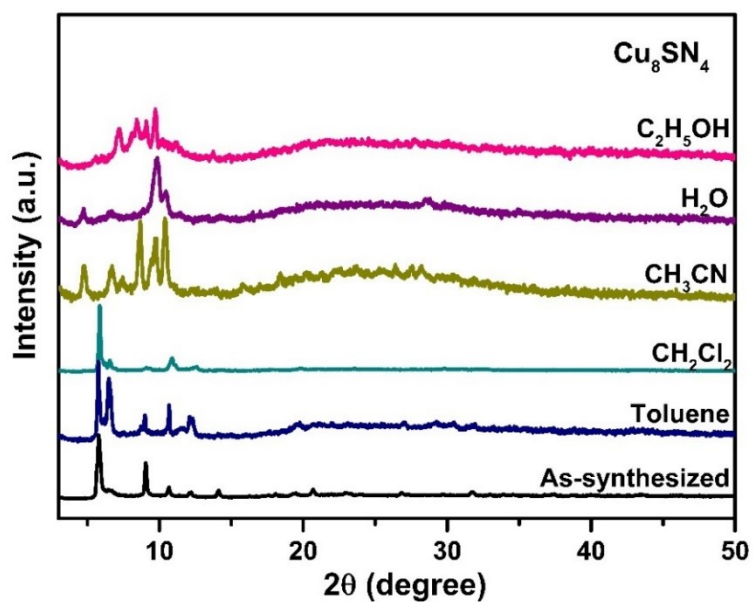

Figure S7. PXRD patterns of  $\text{Cu}_8\text{SN}_4$  immersed in different common organic solvents for 24 hours.

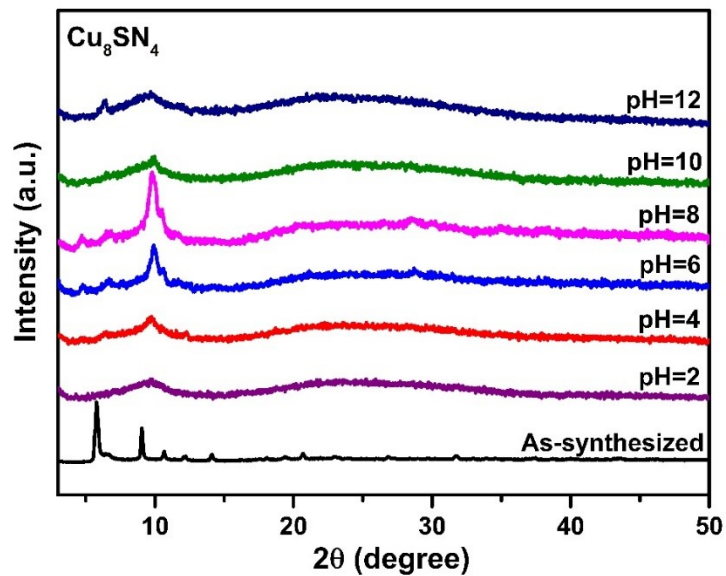

Figure S8. PXRD patterns of  $\text{Cu}_8\text{SN}_4$  treated with different pH for 24 hours.

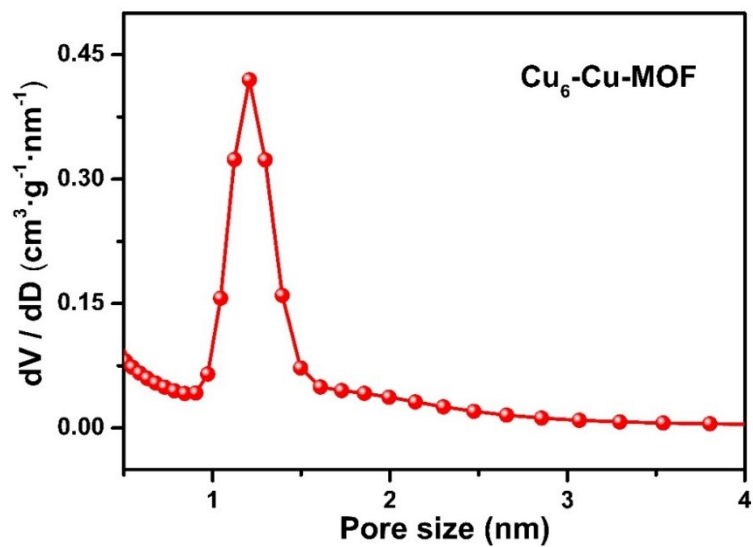

Figure S9. Pore size distribution profile of CCMOF based on nonlocal density function theory.

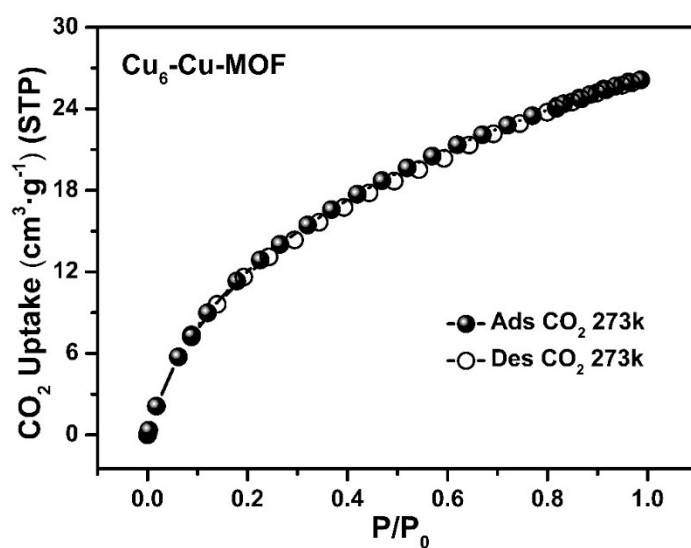

**Figure S10.** CO<sub>2</sub> sorption isotherms of CCMOF at 273 K.

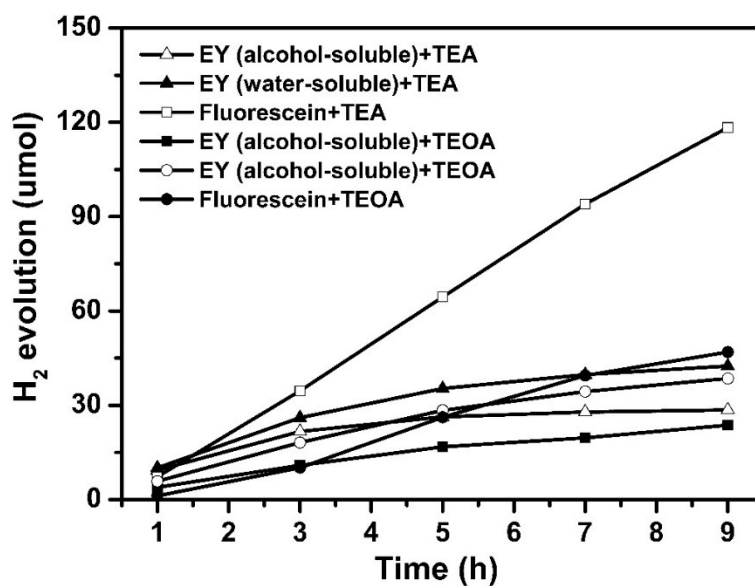

**Figure S11.** The effect of photosensitizer and sacrificial agent on H<sub>2</sub> evolution. H<sub>2</sub> evolution condition: MeOH/H<sub>2</sub>O (1:1) in the presence of 2 mg of CCMOF in 30 mL solution containing sacrificial agent (3 mL) and 10 mg of photosensitizer under an inert atmosphere. The system was irradiated with visible light.

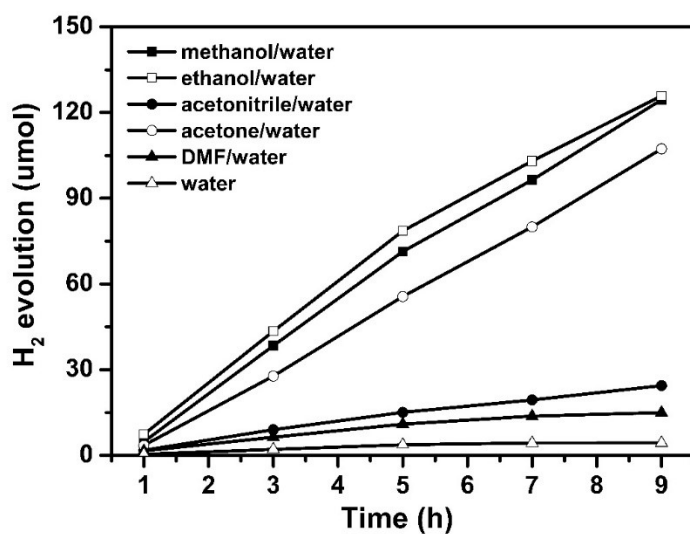

**Figure S12.** The effect of solvents on H<sub>2</sub> evolution. H<sub>2</sub> evolution condition: 2 mg of CCMOF in 30 mL solution containing TEA (3 mL) and 10 mg of fluorescein under an inert atmosphere. The system was irradiated with visible light.

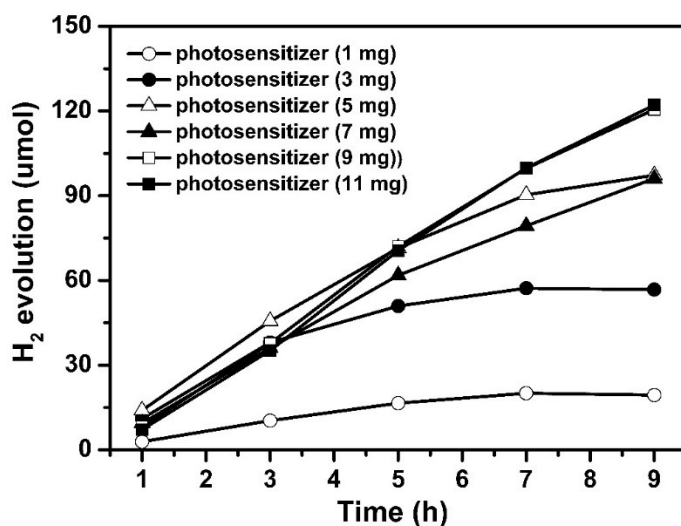

**Figure S13.** The effect of the different mass of photosensitizer on H<sub>2</sub> evolution. H<sub>2</sub> evolution condition: EtOH/H<sub>2</sub>O (1:1) in the presence of 2 mg of CCMOF in 30 mL solution containing TEA (3 mL) under an inert atmosphere. The system was irradiated with visible light.

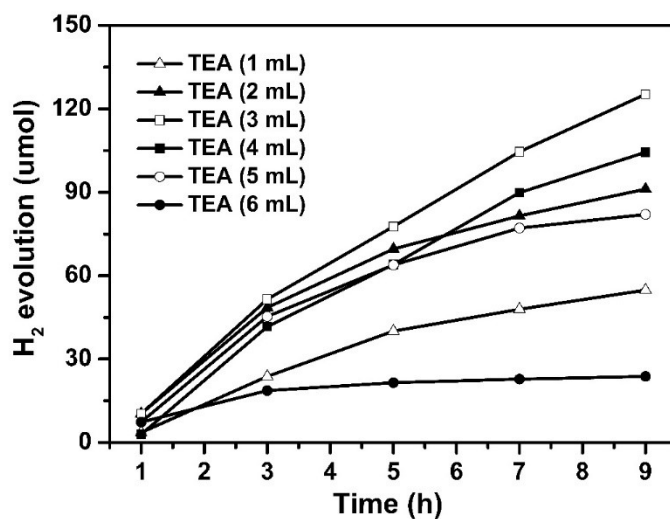

**Figure S14.** The effect of the volume of sacrificial agent on H<sub>2</sub> evolution. H<sub>2</sub> evolution condition: EtOH/H<sub>2</sub>O (1:1) in the presence of 2 mg of CCMOF and 9 mg of fluorescein under an inert atmosphere. The system was irradiated with visible light.

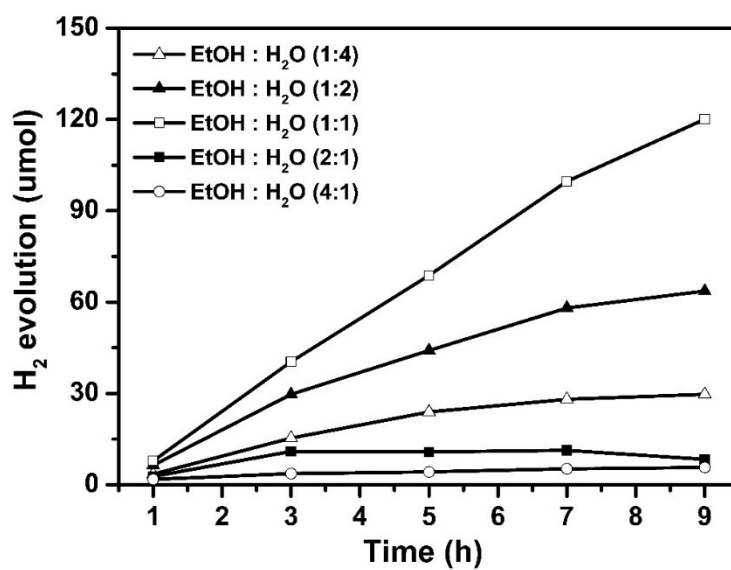

**Figure S15.** The effect of the ratio of the solvent on H<sub>2</sub> evolution. H<sub>2</sub> evolution condition: 2 mg of CCMOF in 30 mL solution containing TEA (3 mL) and 9 mg of fluorescein under an inert atmosphere. The system was irradiated with visible light.



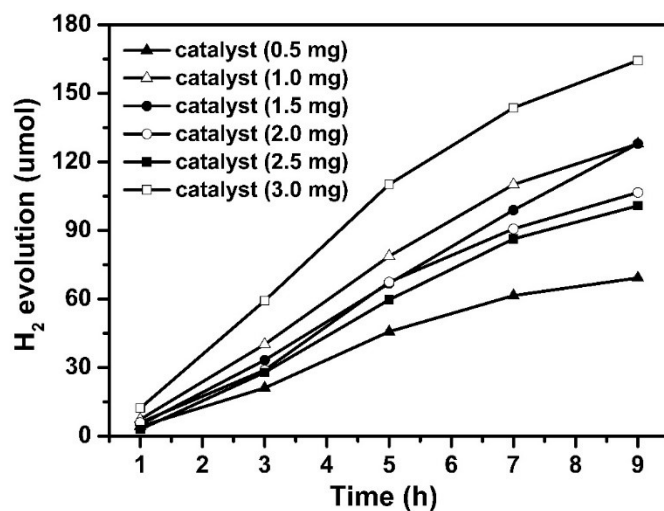

**Figure S16.** The effect of the different mass of catalysts on H<sub>2</sub> evolution. H<sub>2</sub> evolution condition: EtOH/H<sub>2</sub>O (1:1) in the presence of 9 mg of fluorescein in 30 mL solution containing TEA (3 mL) under an inert atmosphere. The system was irradiated with visible light.

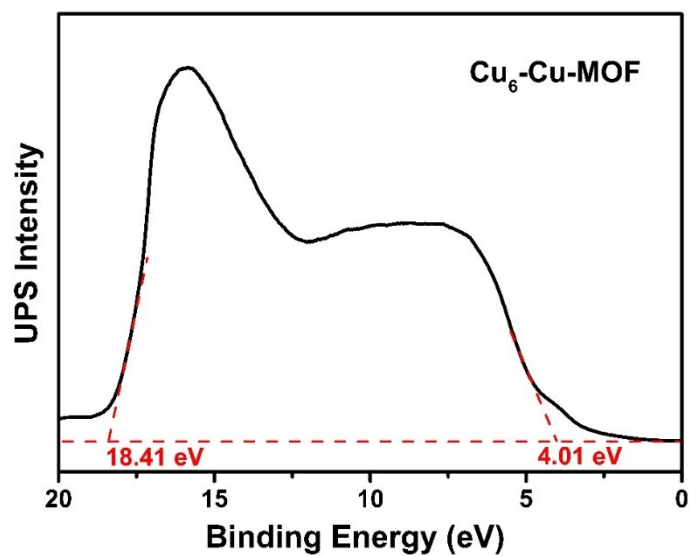

**Figure S17.** UPS spectrum of CCMOF.

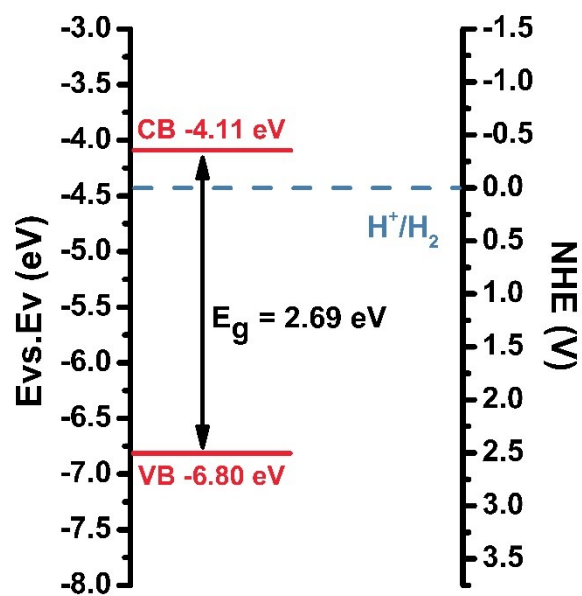

**Figure S18.** The band structure diagram of CCMOF.

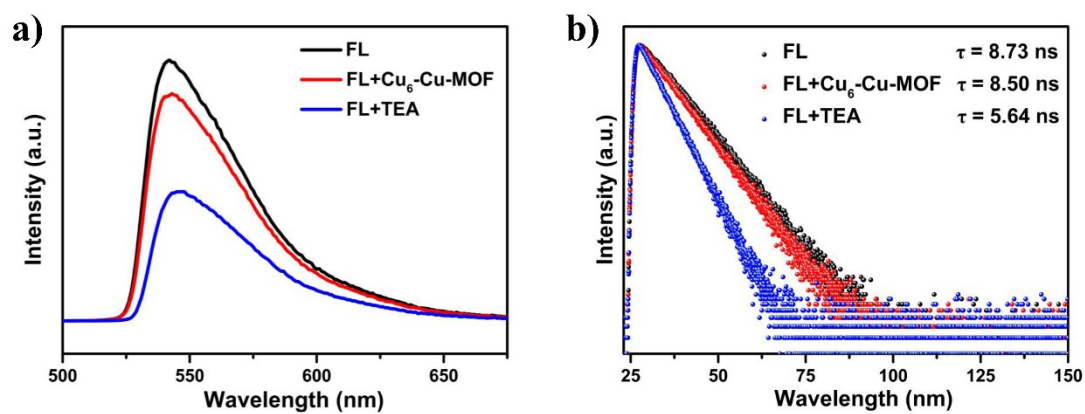

**Figure. 19** (a) Fluorescent spectra of FL solution upon addition of TEA and CCMOF; (b) The corresponding TRPL lifetime decay curves.

**Table S5** Photocatalytic activity of some typical MOF-based and MOF-derived catalysts for hydrogen production.

| MOFs photocatalyst                                                                                                                         | Co-catalyst                      | Photosensitizer                                                                                                                                                      | Activity                                        | Ref.             |
|--------------------------------------------------------------------------------------------------------------------------------------------|----------------------------------|----------------------------------------------------------------------------------------------------------------------------------------------------------------------|-------------------------------------------------|------------------|
| Pt@USTC-8(In)                                                                                                                              | Pt                               | No                                                                                                                                                                   | 340 $\mu\text{mol g}^{-1} \text{h}^{-1}$        | 5                |
| Al-TCPP-0.1Pt                                                                                                                              | Pt                               | No                                                                                                                                                                   | 129 $\mu\text{mol g}^{-1} \text{h}^{-1}$        | 6                |
| MIL-125-(SCH <sub>3</sub> ) <sub>2</sub>                                                                                                   | Pt                               | No                                                                                                                                                                   | 3814 $\mu\text{mol g}^{-1} \text{h}^{-1}$       | 7                |
| MOF-253-Pt                                                                                                                                 | Pt                               | No                                                                                                                                                                   | 100-200 $\mu\text{mol g}^{-1} \text{h}^{-1}$    | 8                |
| Dy-MOF                                                                                                                                     | Pt                               | No                                                                                                                                                                   | 21.53 $\mu\text{mol g}^{-1} \text{h}^{-1}$      | 9                |
| ZSTU-1                                                                                                                                     | Pt                               | No                                                                                                                                                                   | 1350 $\mu\text{mol g}^{-1} \text{h}^{-1}$       | 10               |
| Pt/Ti-MOF-NH <sub>2</sub>                                                                                                                  | Pt                               | No                                                                                                                                                                   | 3.3 $\mu\text{mol h}^{-1}$                      | 11               |
| [Cu <sub>4</sub> (DNP)(SCN)Cl <sub>4</sub> ] <sub>n</sub>                                                                                  | H <sub>2</sub> PtCl <sub>6</sub> | No                                                                                                                                                                   | 27.5 $\mu\text{mol g}^{-1} \text{h}^{-1}$       | 12               |
| Pt@UiO-66-NH <sub>2</sub>                                                                                                                  | Pt                               | No                                                                                                                                                                   | 257.38 $\mu\text{mol g}^{-1} \text{h}^{-1}$     | 13               |
| Pt@UiO-66                                                                                                                                  | Pt                               | Rhodamine B                                                                                                                                                          | 116 $\mu\text{mol g}^{-1} \text{h}^{-1}$        | 14               |
| Pd@UiO-66                                                                                                                                  | Pd                               | Eosin Y                                                                                                                                                              | 2280 $\mu\text{mol g}^{-1} \text{h}^{-1}$       | 15               |
| Co <sub>3</sub> (HL) <sub>2</sub> ·4DMF·4H <sub>2</sub> O                                                                                  | No                               | Ru(bpy) <sub>3</sub> Cl <sub>2</sub>                                                                                                                                 | 1102 $\mu\text{mol g}^{-1} \text{h}^{-1}$       | 16               |
| CdS@UiO-66                                                                                                                                 | No                               | CdS                                                                                                                                                                  | 1725 $\mu\text{mol g}^{-1} \text{h}^{-1}$       | 17               |
| [Zr <sub>6</sub> ( $\mu_3$ -O) <sub>4</sub> ( $\mu_3$ -OH) <sub>4</sub> (L1) <sub>6</sub> ](CO <sub>2</sub> CF <sub>3</sub> ) <sub>6</sub> | No                               | [(n-C <sub>4</sub> H <sub>9</sub> ) <sub>4</sub> N] <sub>10</sub> [Ni <sub>4</sub> (H <sub>2</sub> O) <sub>2</sub> (PW <sub>9</sub> O <sub>34</sub> ) <sub>2</sub> ] | 7.88 mmol g <sup>-1</sup> h <sup>-1</sup>       | 18               |
| [Ni <sub>2</sub> (PymS) <sub>4</sub> ] <sub>n</sub>                                                                                        | No                               | Fluorescein                                                                                                                                                          | 6 $\mu\text{mol h}^{-1}$                        | 19               |
| Cu-RSH                                                                                                                                     | No                               | Eosin Y                                                                                                                                                              | 7.88 mmol g <sup>-1</sup> h <sup>-1</sup>       | 20               |
| MET-Cu-D                                                                                                                                   | No                               | Eosin Y                                                                                                                                                              | 2582 $\mu\text{mol g}^{-1} \text{h}^{-1}$       | 21               |
| {[Cu <sup>I</sup> Cu <sup>II</sup> <sub>2</sub> (DCTP) <sub>2</sub> NO <sub>3</sub> ·1.5DMF] <sub>n</sub>                                  | H <sub>2</sub> PtCl <sub>6</sub> | No                                                                                                                                                                   | 32 $\mu\text{mol g}^{-1} \text{h}^{-1}$         | 22               |
| {[Cu(HDSPTP) <sub>2</sub> (H <sub>2</sub> O) <sub>3</sub> ·6H <sub>2</sub> O] <sub>n</sub>                                                 | No                               | No                                                                                                                                                                   | 5.77 $\mu\text{mol h}^{-1}$                     | 23               |
| <b>Cu<sub>6</sub>-Cu-MOF</b>                                                                                                               | <b>No</b>                        | <b>Fluorescein</b>                                                                                                                                                   | <b>14.22 mmol g<sup>-1</sup> h<sup>-1</sup></b> | <b>This work</b> |

## References

- 1 G. M. Sheldrick, *Acta Cryst. A*, 2008, **64**, 112-122.
- 2 O. V. Dolomanov, L. J. Bourhis, R. J. Gildea, J. A. K. Howard and H. Puschmann, *J. Appl. Crystallogr.*, 2009, **42**, 339-341.
- 3 G. Sheldrick, *Acta Cryst. C*, 2015, **71**, 3-8.
- 4 W. Liu, Y. Fang, G. Z. Wei, S. J. Teat, K. Xiong, Z. Hu, W. P. Lustig and J. Li, *J. Am. Chem. Soc.*, 2015, **137**, 9400-9408.
- 5 F. Leng, H. Liu, M. Ding, Q.-P. Lin and H.-L. Jiang, *ACS Catal.*, 2018, **8**, 4583-4590.
- 6 X. Fang, Q. Shang, Y. Wang, L. Jiao, T. Yao, Y. Li, Q. Zhang, Y. Luo and H. L. Jiang, *Adv. Mater.*, 2018, **30**, 1705112.
- 7 S. Y. Han, D. L. Pan, H. Chen, X. B. Bu, Y. X. Gao, H. Gao, Y. Tian, G. S. Li, G. Wang, S. L. Cao, C. Q. Wan and G. C. Guo, *Angew. Chem. Int. Ed.*, 2018, **57**, 9864-9869.
- 8 T. Zhou, Y. Du, A. Borgna, J. Hong, Y. Wang, J. Han, W. Zhang and R. Xu, *Energy Environ. Sci.*, 2013, **6**, 3229-3234.
- 9 Q. Yu, H. Dong, X. Zhang, Y.-X. Zhu, J.-H. Wang, F.-M. Zhang and X.-J. Sun, *CrystEngComm*, 2018, **20**, 3228-3233.
- 10 C. Li, H. Xu, J. Gao, W. Du, L. Shangguan, X. Zhang, R.-B. Lin, H. Wu, W. Zhou, X. Liu, J. Yao and B. Chen, *J. Mater. Chem. A*, 2019, **7**, 11928-11933.
- 11 T. Toyao, M. Saito, Y. Horiuchi, K. Mochizuki, M. Iwata, H. Higashimura and M. Matsuoka, *Catal. Sci. Technol.*, 2013, **3**, 2092-2097.
- 12 L. Li, L. Huang, Z.-Y. Liu, X.-J. Zhao and E.-C. Yang, *Anorg. Allg. Chem.*, 2019, **645**, 623-630.
- 13 J.-D. Xiao, Q. Shang, Y. Xiong, Q. Zhang, Y. Luo, S.-H. Yu and H.-L. Jiang, *Angew. Chem. Int. Ed.*, 2016, **55**, 9389-9393.
- 14 D. Kim, D. R. Whang and S. Y. Park, *J. Am. Chem. Soc.*, 2016, **138**, 8698-8701.
- 15 Z. Jin and H. Yang, *Nanoscale Res. Lett.*, 2017, **12**, 539.
- 16 W.-M. Liao, J.-H. Zhang, Z. Wang, Y.-L. Lu, S.-Y. Yin, H.-P. Wang, Y.-N. Fan, M. Pan and C.-Y. Su, *Inorg. Chem.*, 2018, **57**, 11436-11442.
- 17 H.-Q. Xu, S. Yang, X. Ma, J. Huang and H.-L. Jiang, *ACS Catal.*, 2018, **8**, 11615-11621.
- 18 X.-J. Kong, Z. Lin, Z.-M. Zhang, T. Zhang and W. Lin, *Angew. Chem. Int. Ed.*, 2016, **55**, 6411-6416.
- 19 Y. Feng, C. Chen, Z. Liu, B. Fei, P. Lin, Q. Li, S. Sun and S. Du, *J. Mater. Chem. A*, 2015, **3**, 7163-7169.
- 20 X.-Y. Dong, M. Zhang, R.-B. Pei, Q. Wang, D.-H. Wei, S.-Q. Zang, Y.-T. Fan and T. C. W. Mak, *Angew. Chem. Int. Ed.*, 2016, **55**, 2073-2077.
- 21 Z.-D. Wang, Y. Zang, Z.-J. Liu, P. Peng, R. Wang and S.-Q. Zang, *Appl. Catal. B Environ.*, 2021, **288**, 119941.
- 22 Z.-L. Wu, C.-H. Wang, B. Zhao, J. Dong, F. Lu, W.-H. Wang, W.-C. Wang, G.-J. Wu, J.-Z. Cui and P. Cheng, *Angew. Chem. Int. Ed.*, 2016, **55**, 4938-4942.
- 23 T. Song, L. Zhang, P. Zhang, J. Zeng, T. Wang, A. Ali and H. Zeng, *J. Mater. Chem. A*, 2017, **5**, 6013-6018.
